# Supplementary material for: Kinetic and Thermodynamic Analyses of Co-Pyrolysis of Nylon-Polyethylene Pouch Wastes
Source: MDPI journal article supplement (doi:10.3390/ma16175738), 2023-08-22
Supplement: s1 [file s1]

Supplementary materials

**Kinetic and thermodynamic analyses of co-pyrolysis of  
nylon-polyethylene pouch wastes**

Hai-bo Wan, Zhen Huang

*Tianjin University of Commerce, Tianjin 300134, China*

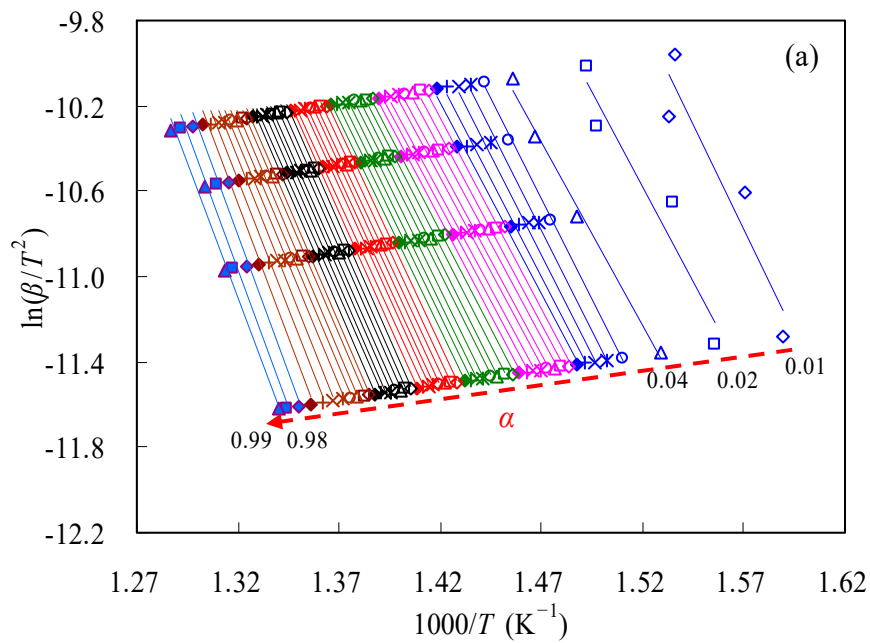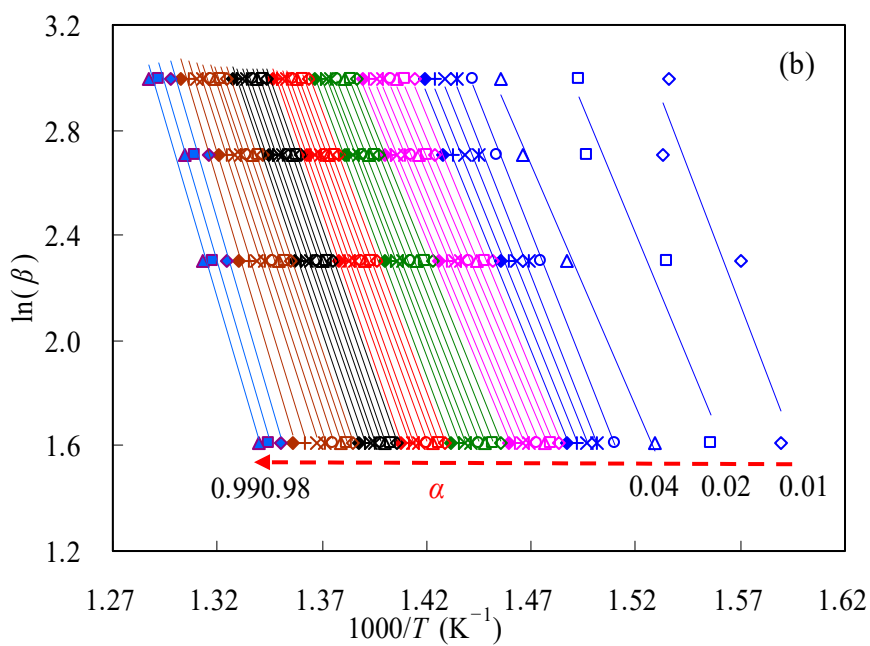

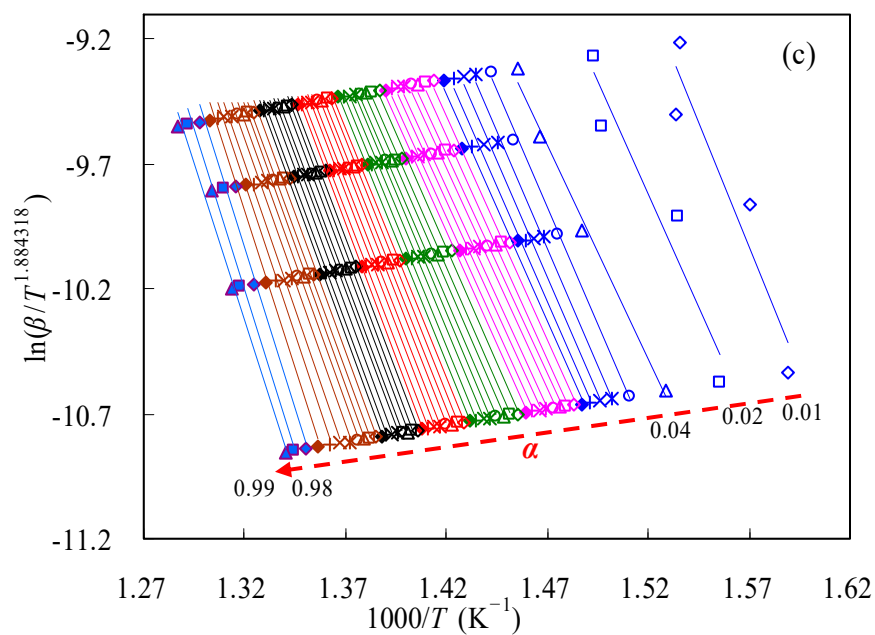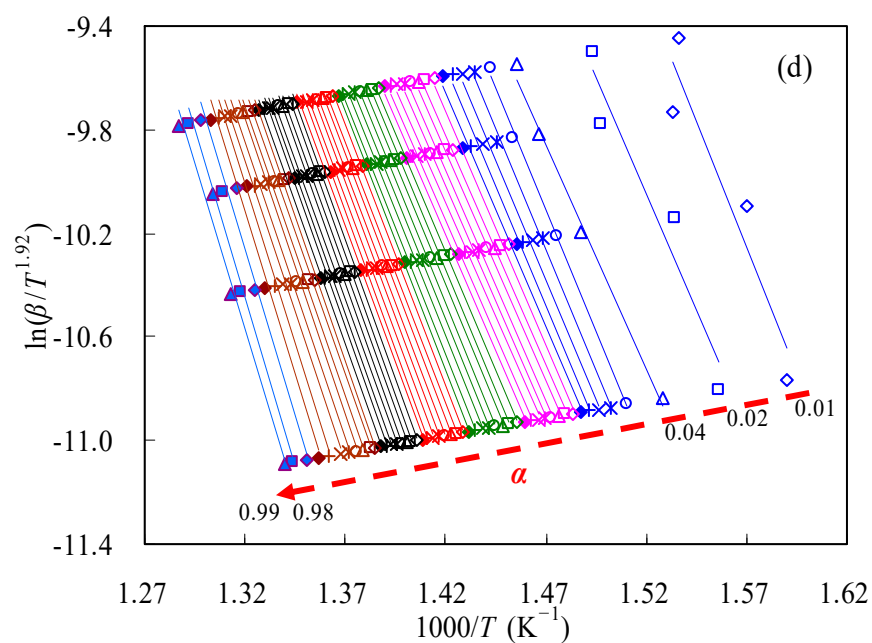

Figure S1. The Arrhenius linear plots of the N-PE waste with: (a) CR method, (b) FWO method, (c) MKN method and (d) SK method.
